# Supplementary material for: A systematic comparison of different techniques to determine the zeta potential of silica nanoparticles in biological medium
Source: Royal Society of Chemistry journal article supplement (doi:10.1039/c5ay02014j), 2015-01-01
Supplement: c5ay02014j1.pdf [file c5ay02014j1.pdf]

## Supporting Information for: A systematic comparison of different techniques to determine the zeta potential of silica nanoparticles in biological medium

Aneta Sikora,<sup>a</sup> Dorota Bartczak,<sup>b</sup> Daniel Geißler,<sup>c</sup> Vikram Kestens,<sup>d</sup> Gert Roebben,<sup>d</sup> Yannic Ramaye,<sup>d</sup> Zoltan Varga,<sup>e</sup> Marcell Palmay,<sup>e</sup> Alexander G. Shard,<sup>a</sup> Heidi Goenaga-Infante,<sup>b</sup> and Caterina Minelli<sup>a†</sup>

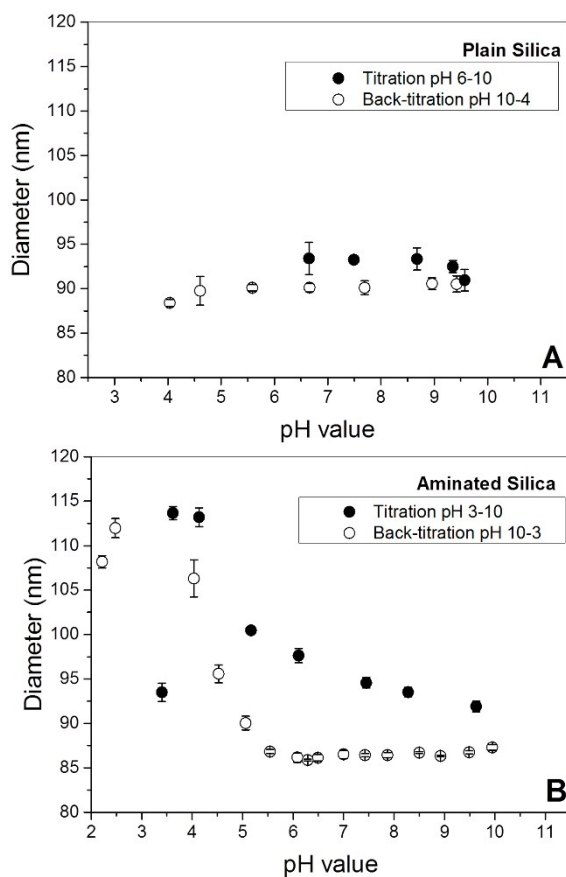

**Figure S1.** Particle size (DLS cumulants method) measurements of plain(A) and aminated (B) silica NPs at different pH.

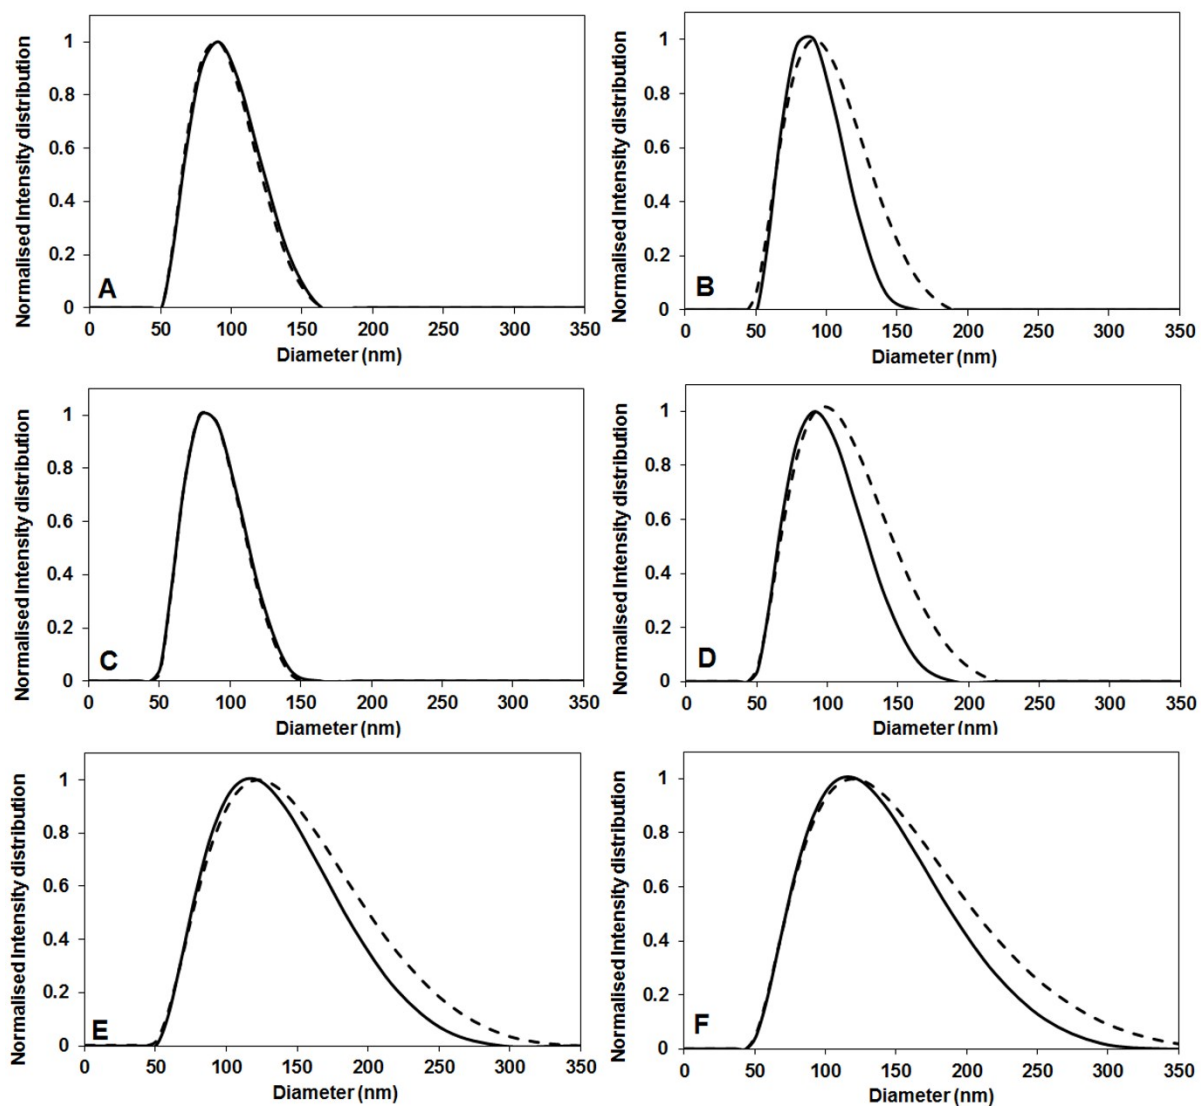

**Figure S2.** Representative DLS normalised scattered light intensity-weighted particle size distributions obtained at 0 h (continuous line) and 24 h (dash line) after dispersing plain (A, C and E) and aminated (B, D and F) silica NPs in purified water (A and B), Tris-HCl (C and D) and 10 % FBS-EMEM (E and F) respectively.

**Table S1.** Additional technical requirements for  $\zeta$ -potential measurements.

| Properties                            | ELS                                                                                                                                                                                                                                                                     | TRPS                                                                                                                                                                                          | zPTA                                                                                                                                                                                                                   |
|---------------------------------------|-------------------------------------------------------------------------------------------------------------------------------------------------------------------------------------------------------------------------------------------------------------------------|-----------------------------------------------------------------------------------------------------------------------------------------------------------------------------------------------|------------------------------------------------------------------------------------------------------------------------------------------------------------------------------------------------------------------------|
| <b>NP size range</b>                  | 3.8 nm to 100 $\mu$ m                                                                                                                                                                                                                                                   | 70 nm to 800 nm<br>(for larger particles the recommendation is to contact Izon)                                                                                                               | 10-20 nm to 1-2 $\mu$ m<br>depending on particle refractive index, medium, sensitivity of the camera, and wavelength and power of the laser.                                                                           |
| <b>Measurable concentration range</b> | <10 nm: 0.5 g/L - limited by sample material interaction, e.g. aggregation.<br>10-100 nm: 0.1 mg/L to 5% mass, assuming a density of 1 g/cm <sup>3</sup><br>100 nm-1 $\mu$ m: 0.01 g/L -1% mass assuming a density of 1g/cm <sup>3</sup><br>>1 $\mu$ m: 0.1g/L-1% mass) | 10 <sup>5</sup> -10 <sup>12</sup> NPs/mL                                                                                                                                                      | 10 <sup>7</sup> -10 <sup>10</sup> NPs/mL                                                                                                                                                                               |
| <b>Optimal concentration</b>          | Dependent on the scattering properties of the measured materials and the particle size. Should be determined experimentally                                                                                                                                             | 1 x 10 <sup>9</sup> NPs/mL to 5 x 10 <sup>10</sup> NPs/mL depending on size                                                                                                                   | Dependent on the scattering properties of the material. The recommended number of NPs in the field of view is 20-60. For silica NPs optimal concentration was found between 10 <sup>8</sup> to 10 <sup>9</sup> NPs/mL. |
| <b>Type of buffers</b>                | Aqueous/polar/non-polar. Highly conductive samples can lead to electrode polarisation and degradation.                                                                                                                                                                  | Variety of electrolytes with molarity > 10 mM. Applied voltage need to be adjusted to have a current >120 nA and a stable baseline. Membrane surface potential need to be known or estimated. | Variety of electrolytes inert to glass, steel and rubber; sample conductivities 0.005 mS/cm to 5 mS/cm.                                                                                                                |

**Table S2.**  $\zeta$ -potential values of plain silica measured by z-PTA.

| Medium          | time | $\zeta$ -potential (mV) |
|-----------------|------|-------------------------|
| 150 mM Tris-HCl | 0 h  | -21 $\pm$ 1             |
|                 | 24 h | -21 $\pm$ 2             |
